# Supplementary material for: A Balance between the Activities of Chloroplasts and Mitochondria Is Crucial for Optimal Plant Growth
Source: MDPI journal article supplement (doi:10.3390/antiox10060935), 2021-06-09
Supplement: s1 [file s1]

**Table S1.** Vector constructs and primers in this study.

| Vector                      | Primer Name         | Primer Sequence (5'–3')           |
|-----------------------------|---------------------|-----------------------------------|
| pCXSN_P2TOM<br>/pCXSN_P2TOC | AtPAP2-SalI-F       | GGCCGTCGACATGATCGTTAATT TCTCTTTC  |
| pCXSN_P2TOM                 | TOMoverlapF         | GGCCGTCGACATGATCGTTAATT TCTCTTTC  |
| pCXSN_P2TOM                 | P2overTOMR          | ATCAGTGGGAGCAAAGTGAAGAATAAGAAAAG  |
| pCXSN_P2TOC                 | TOCoverlapF         | ATCAGTGGGAGCAAAGTAGATGGATCTTACTCT |
| pCXSN_P2TOC                 | P2overTOCR          | GTAAGATCCATCTACTTTGCTCCCACTGATTAC |
| pBI221                      | TOM20-SpeI-<br>GFPF | CGCAACTAGTGTGAAGAATAAGAAAAG       |
| pBI221                      | TOM20-SacI-<br>GFPR | TTTTGAGCTCTTAACGAGGAGGAGAGA       |
| pBI221                      | TOC33-SpeI-<br>GFPF | GCAGACTAGTGTAGATGGATCTTACTCT      |
| pBI221                      | TOC33-SacI-<br>GFPR | TTTTGAGCTCTTAAAGTGGCTTTCCAC       |
